# Supplementary material
Source: Springer Nature journal article supplement (https://www.springermedizin.de/resource/supplementary/13012_2011_442_MOESM9_ESM.pdf/9630150)
Supplement: MOESM9 [file 9630150]

**Randomisation**

**Intervention practices**

**(n=22)**

**COPD**

**(n=625)**

**Diabetes**

**(n=1063)**

**IBS**

**(n=611)**

**Control practices**

**(n=22)**

**COPD**

**(n=1016)**

**Diabetes**

**(n=1486)**

**IBS**

**(n=809)**
